# Supplementary material for: The time cost of saving money: detouring and connecting time losses in the virtually interlined European airport network
Source: Springer Nature journal article supplement (doi:10.1186/s12544-022-00551-4), 2022-06-21
Supplement: MOESM1 [file 23192728]

## Appendix A: Overview of the air transport markets included in the analysis

**Table A.1:** Number of markets where the cheapest virtually interlined flight renders a price advantage relative to its *indirect* traditional counterpart.

| Departure date   | Data collection round |        |        |
|------------------|-----------------------|--------|--------|
|                  | A                     | B      | C      |
| 01 August 2019   | 21 532                | 23 911 | 24 470 |
| 02 August 2019   | 21 678                | 22 927 | 24 376 |
| 03 August 2019   | 21 288                | 21 814 | 22 905 |
| 04 August 2019   | 22 568                | 22 976 | 24 143 |
| 05 August 2019   | 22 716                | 23 565 | 25 079 |
| 06 August 2019   | 22 322                | 23 463 | 24 358 |
| 07 August 2019   | 22 039                | 23 337 | 22 302 |
| 01 October 2019  | 10 863                | 12 710 | 16 416 |
| 02 October 2019  | 10 792                | 11 639 | 20 186 |
| 03 October 2019  | 10 465                | 11 981 | 20 440 |
| 04 October 2019  | 10 503                | 12 299 | 20 224 |
| 05 October 2019  | 9906                  | 11 564 | 17 886 |
| 06 October 2019  | 10 368                | 11 612 | 17 772 |
| 07 October 2019  | 10 371                | 12 096 | 21 232 |
| 01 December 2019 | 10 399                | 11 006 | 16 369 |
| 02 December 2019 | 10 181                | 11 434 | 15 695 |
| 03 December 2019 | 9407                  | 11 794 | 14 880 |
| 04 December 2019 | 9811                  | 12 672 | 14 526 |
| 05 December 2019 | 10 555                | 14 410 | 15 634 |
| 06 December 2019 | 12 220                | 15 140 | 16 347 |
| 07 December 2019 | 8822                  | 12 850 | 13 747 |

**Appendix B: Descriptive statistics on the transfer time and geographical detour factor difference distributions (for all markets where virtual interlining renders a price advantage)**

**Table B.1:** Descriptive statistics (for August, 2019) on the iTR-VI transfer time difference distribution.

| Departure date | Round | Median  | Mean    | Skewness | Kurtosis | KS-statistic | KS p-value |
|----------------|-------|---------|---------|----------|----------|--------------|------------|
| 01 August 2019 | A     | -11.250 | -12.563 | -0.606   | 0.437    | 0.054        | .000       |
|                | B     | -12.833 | -13.891 | -0.491   | 0.151    | 0.048        | .000       |
|                | C     | -10.583 | -11.830 | -0.497   | 0.379    | 0.049        | .000       |
| 02 August 2019 | A     | -11.417 | -13.256 | -0.592   | 0.219    | 0.066        | .000       |
|                | B     | -13.500 | -14.930 | -0.462   | -0.100   | 0.058        | .000       |
|                | C     | -11.083 | -12.419 | -0.445   | 0.199    | 0.050        | .000       |
| 03 August 2019 | A     | -13.250 | -14.090 | -0.351   | 0.064    | 0.040        | .000       |
|                | B     | -14.667 | -15.568 | -0.350   | -0.102   | 0.041        | .000       |
|                | C     | -11.083 | -12.185 | -0.423   | 0.333    | 0.042        | .000       |
| 04 August 2019 | A     | -13.833 | -14.945 | -0.428   | -0.039   | 0.049        | .000       |
|                | B     | -14.917 | -15.831 | -0.371   | -0.180   | 0.043        | .000       |
|                | C     | -12.417 | -13.389 | -0.402   | 0.157    | 0.040        | .000       |
| 05 August 2019 | A     | -13.500 | -14.621 | -0.511   | 0.092    | 0.046        | .000       |
|                | B     | -14.500 | -15.507 | -0.414   | -0.079   | 0.041        | .000       |
|                | C     | -11.333 | -12.200 | -0.366   | 0.217    | 0.036        | .000       |
| 06 August 2019 | A     | -13.500 | -14.537 | -0.492   | 0.045    | 0.044        | .000       |
|                | B     | -14.750 | -15.788 | -0.435   | -0.135   | 0.045        | .000       |
|                | C     | -11.167 | -12.054 | -0.411   | 0.351    | 0.036        | .000       |
| 07 August 2019 | A     | -12.333 | -13.516 | -0.514   | 0.231    | 0.050        | .000       |
|                | B     | -13.167 | -14.303 | -0.501   | 0.121    | 0.047        | .000       |
|                | C     | -10.417 | -11.352 | -0.431   | 0.372    | 0.040        | .000       |

**Table B.2:** Descriptive statistics (for October, 2019) on the iTR-VI transfer time difference distribution.

| Departure date  | Round | Median  | Mean    | Skewness | Kurtosis | KS-statistic | KS p-value |
|-----------------|-------|---------|---------|----------|----------|--------------|------------|
| 01 October 2019 | A     | -9.500  | -10.762 | -0.735   | 0.932    | 0.063        | .000       |
|                 | B     | -10.083 | -11.234 | -0.682   | 0.814    | 0.056        | .000       |
|                 | C     | -11.083 | -12.292 | -0.629   | 0.663    | 0.054        | .000       |
| 02 October 2019 | A     | -8.833  | -10.296 | -0.704   | 0.775    | 0.073        | .000       |
|                 | B     | -9.333  | -10.904 | -0.691   | 0.585    | 0.072        | .000       |
|                 | C     | -10.750 | -12.056 | -0.601   | 0.356    | 0.059        | .000       |
| 03 October 2019 | A     | -9.167  | -10.690 | -0.803   | 0.901    | 0.072        | .000       |
|                 | B     | -9.500  | -11.274 | -0.702   | 0.571    | 0.075        | .000       |
|                 | C     | -11.750 | -13.146 | -0.599   | 0.151    | 0.059        | .000       |
| 04 October 2019 | A     | -10.000 | -11.279 | -0.640   | 0.600    | 0.062        | .000       |
|                 | B     | -10.500 | -11.743 | -0.565   | 0.538    | 0.056        | .000       |
|                 | C     | -11.917 | -12.854 | -0.474   | 0.405    | 0.043        | .000       |
| 05 October 2019 | A     | -9.750  | -11.235 | -0.731   | 0.744    | 0.069        | .000       |
|                 | B     | -9.917  | -11.528 | -0.635   | 0.623    | 0.067        | .000       |
|                 | C     | -12.167 | -13.374 | -0.492   | 0.177    | 0.053        | .000       |
| 06 October 2019 | A     | -10.833 | -12.079 | -0.655   | 0.580    | 0.059        | .000       |
|                 | B     | -11.500 | -12.544 | -0.568   | 0.343    | 0.056        | .000       |
|                 | C     | -13.583 | -14.215 | -0.454   | 0.053    | 0.041        | .000       |
| 07 October 2019 | A     | -9.917  | -11.083 | -0.768   | 0.948    | 0.059        | .000       |
|                 | B     | -10.083 | -11.396 | -0.754   | 0.890    | 0.063        | .000       |
|                 | C     | -12.917 | -14.001 | -0.560   | 0.263    | 0.046        | .000       |

**Table B.3:** Descriptive statistics (for December, 2019) on the iTR-VI transfer time difference distribution.

| Departure date   | Round | Median  | Mean    | Skewness | Kurtosis | KS-statistic | KS p-value |
|------------------|-------|---------|---------|----------|----------|--------------|------------|
| 01 December 2019 | A     | -11.833 | -12.345 | -0.546   | 0.477    | 0.048        | .000       |
|                  | B     | -12.250 | -12.585 | -0.466   | 0.468    | 0.039        | .000       |
|                  | C     | -14.583 | -14.750 | -0.419   | 0.089    | 0.043        | .000       |
| 02 December 2019 | A     | -10.083 | -11.334 | -0.684   | 0.674    | 0.061        | .000       |
|                  | B     | -10.417 | -11.418 | -0.639   | 0.641    | 0.056        | .000       |
|                  | C     | -12.833 | -13.743 | -0.583   | 0.330    | 0.046        | .000       |
| 03 December 2019 | A     | -10.417 | -11.493 | -0.594   | 0.580    | 0.058        | .000       |
|                  | B     | -10.833 | -11.947 | -0.565   | 0.372    | 0.055        | .000       |
|                  | C     | -12.167 | -12.959 | -0.508   | 0.259    | 0.048        | .000       |
| 04 December 2019 | A     | -9.833  | -11.399 | -0.775   | 0.743    | 0.072        | .000       |
|                  | B     | -10.833 | -12.163 | -0.727   | 0.583    | 0.060        | .000       |
|                  | C     | -11.417 | -12.589 | -0.673   | 0.543    | 0.057        | .000       |
| 05 December 2019 | A     | -11.500 | -12.132 | -0.513   | 0.274    | 0.058        | .000       |
|                  | B     | -12.917 | -13.425 | -0.475   | 0.078    | 0.052        | .000       |
|                  | C     | -13.083 | -13.731 | -0.465   | 0.055    | 0.047        | .000       |
| 06 December 2019 | A     | -10.417 | -11.860 | -0.762   | 0.861    | 0.064        | .000       |
|                  | B     | -11.833 | -13.099 | -0.589   | 0.301    | 0.051        | .000       |
|                  | C     | -12.583 | -13.733 | -0.506   | 0.239    | 0.045        | .000       |
| 07 December 2019 | A     | -9.667  | -10.663 | -0.546   | 0.753    | 0.052        | .000       |
|                  | B     | -11.000 | -11.844 | -0.458   | 0.396    | 0.043        | .000       |
|                  | C     | -11.500 | -12.398 | -0.528   | 0.349    | 0.043        | .000       |

**Table B.4:** Descriptive statistics (for August, 2019) on the iTR-VI geographical detour factor difference distribution.

| Departure date | Round | Median | Mean   | Skewness | Kurtosis | KS-statistic | KS p-value |
|----------------|-------|--------|--------|----------|----------|--------------|------------|
| 01 August 2019 | A     | -0.124 | -0.400 | 12.647   | 1371.176 | 0.218        | 0.000      |
|                | B     | -0.225 | -0.566 | -4.913   | 69.389   | 0.203        | 0.000      |
|                | C     | -0.125 | -0.428 | -8.892   | 213.121  | 0.220        | 0.000      |
| 02 August 2019 | A     | -0.122 | -0.363 | -4.870   | 75.451   | 0.201        | 0.000      |
|                | B     | -0.174 | -0.465 | -5.958   | 83.577   | 0.199        | 0.000      |
|                | C     | -0.129 | -0.438 | -6.783   | 171.191  | 0.218        | 0.000      |
| 03 August 2019 | A     | -0.131 | -0.320 | -1.923   | 190.039  | 0.193        | 0.000      |
|                | B     | -0.199 | -0.461 | -7.138   | 141.682  | 0.204        | 0.000      |
|                | C     | -0.176 | -0.509 | -5.088   | 77.776   | 0.202        | 0.000      |
| 04 August 2019 | A     | -0.158 | -0.433 | -4.594   | 79.395   | 0.197        | 0.000      |
|                | B     | -0.202 | -0.524 | -8.894   | 189.344  | 0.206        | 0.000      |
|                | C     | -0.189 | -0.595 | -7.645   | 152.897  | 0.217        | 0.000      |
| 05 August 2019 | A     | -0.177 | -0.506 | -6.710   | 96.329   | 0.207        | 0.000      |
|                | B     | -0.233 | -0.588 | -7.803   | 130.361  | 0.214        | 0.000      |
|                | C     | -0.175 | -0.600 | -7.587   | 131.069  | 0.219        | 0.000      |
| 06 August 2019 | A     | -0.209 | -0.574 | -7.012   | 129.522  | 0.203        | 0.000      |
|                | B     | -0.281 | -0.662 | -7.398   | 116.062  | 0.213        | 0.000      |
|                | C     | -0.202 | -0.641 | -7.974   | 173.273  | 0.215        | 0.000      |
| 07 August 2019 | A     | -0.192 | -0.529 | 9.908    | 1163.713 | 0.228        | 0.000      |
|                | B     | -0.259 | -0.622 | -7.741   | 151.727  | 0.214        | 0.000      |
|                | C     | -0.205 | -0.667 | -7.159   | 128.309  | 0.227        | 0.000      |

**Table B.5:** Descriptive statistics (for October, 2019) on the iTR-VI geographical detour factor difference distribution.

| Departure date  | Round | Median | Mean   | Skewness | Kurtosis | KS-statistic | KS p-value |
|-----------------|-------|--------|--------|----------|----------|--------------|------------|
| 01 October 2019 | A     | -0.150 | -0.569 | -10.390  | 232.948  | 0.213        | 0.000      |
|                 | B     | -0.184 | -0.629 | -9.006   | 160.079  | 0.215        | 0.000      |
|                 | C     | -0.258 | -0.711 | -5.720   | 62.478   | 0.204        | 0.000      |
| 02 October 2019 | A     | -0.156 | -0.569 | -10.000  | 220.847  | 0.219        | 0.000      |
|                 | B     | -0.184 | -0.619 | -8.560   | 144.877  | 0.217        | 0.000      |
|                 | C     | -0.288 | -0.762 | -5.338   | 113.026  | 0.215        | 0.000      |
| 03 October 2019 | A     | -0.135 | -0.485 | -5.532   | 75.535   | 0.194        | 0.000      |
|                 | B     | -0.180 | -0.564 | -25.305  | 1374.225 | 0.244        | 0.000      |
|                 | C     | -0.251 | -0.704 | -13.338  | 416.623  | 0.225        | 0.000      |
| 04 October 2019 | A     | -0.126 | -0.479 | -7.165   | 147.484  | 0.208        | 0.000      |
|                 | B     | -0.193 | -0.608 | -10.186  | 209.270  | 0.214        | 0.000      |
|                 | C     | -0.260 | -0.720 | 5.387    | 806.392  | 0.233        | 0.000      |
| 05 October 2019 | A     | -0.154 | -0.438 | -4.401   | 68.503   | 0.190        | 0.000      |
|                 | B     | -0.182 | -0.560 | -4.988   | 58.807   | 0.192        | 0.000      |
|                 | C     | -0.272 | -0.732 | -10.280  | 315.144  | 0.214        | 0.000      |
| 06 October 2019 | A     | -0.148 | -0.494 | -4.162   | 70.357   | 0.190        | 0.000      |
|                 | B     | -0.167 | -0.551 | -6.514   | 108.288  | 0.200        | 0.000      |
|                 | C     | -0.251 | -0.727 | -6.173   | 79.267   | 0.206        | 0.000      |
| 07 October 2019 | A     | -0.126 | -0.503 | -7.301   | 122.998  | 0.202        | 0.000      |
|                 | B     | -0.180 | -0.590 | -7.784   | 137.891  | 0.210        | 0.000      |
|                 | C     | -0.305 | -0.791 | -7.161   | 126.686  | 0.206        | 0.000      |

**Table B.6:** Descriptive statistics (for December, 2019) on the iTR-VI geographical detour factor difference distribution.

| Departure date   | Round | Median | Mean   | Skewness | Kurtosis | KS-statistic | KS p-value |
|------------------|-------|--------|--------|----------|----------|--------------|------------|
| 01 December 2019 | A     | -0.185 | -0.680 | -8.962   | 155.067  | 0.226        | 0.000      |
|                  | B     | -0.147 | -0.609 | -12.007  | 286.916  | 0.236        | 0.000      |
|                  | C     | -0.324 | -0.881 | -14.928  | 526.426  | 0.227        | 0.000      |
| 02 December 2019 | A     | -0.173 | -0.648 | -20.965  | 864.553  | 0.259        | 0.000      |
|                  | B     | -0.168 | -0.622 | -28.656  | 1383.729 | 0.268        | 0.000      |
|                  | C     | -0.317 | -0.839 | -21.972  | 937.163  | 0.247        | 0.000      |
| 03 December 2019 | A     | -0.173 | -0.634 | -13.197  | 331.296  | 0.248        | 0.000      |
|                  | B     | -0.212 | -0.711 | -26.607  | 1204.942 | 0.271        | 0.000      |
|                  | C     | -0.272 | -0.816 | -23.123  | 929.816  | 0.261        | 0.000      |
| 04 December 2019 | A     | -0.169 | -0.617 | -29.039  | 1328.242 | 0.278        | 0.000      |
|                  | B     | -0.213 | -0.667 | -28.245  | 1453.529 | 0.256        | 0.000      |
|                  | C     | -0.307 | -0.800 | -25.986  | 1186.392 | 0.250        | 0.000      |
| 05 December 2019 | A     | -0.157 | -0.619 | -22.645  | 996.224  | 0.267        | 0.000      |
|                  | B     | -0.263 | -0.778 | -22.542  | 971.865  | 0.254        | 0.000      |
|                  | C     | -0.321 | -0.825 | -18.065  | 711.093  | 0.240        | 0.000      |
| 06 December 2019 | A     | -0.202 | -0.718 | -18.250  | 708.991  | 0.246        | 0.000      |
|                  | B     | -0.297 | -0.860 | -23.765  | 1038.992 | 0.251        | 0.000      |
|                  | C     | -0.344 | -0.944 | -18.039  | 654.319  | 0.246        | 0.000      |
| 07 December 2019 | A     | -0.197 | -0.706 | -21.684  | 1010.480 | 0.244        | 0.000      |
|                  | B     | -0.310 | -0.854 | -17.564  | 790.402  | 0.215        | 0.000      |
|                  | C     | -0.389 | -0.999 | -16.214  | 613.901  | 0.230        | 0.000      |

## Appendix C: Sign test results (for all markets where virtual interlining renders a price advantage)

**Table C.1:** Sign test results for the transfer time component (for August, 2019).

| Departure date | Data collection | S+   | S-    | Ties | STS         |
|----------------|-----------------|------|-------|------|-------------|
| 01 August 2019 | A               | 1521 | 19981 | 30   | -125.883*** |
|                | B               | 1619 | 22267 | 25   | -133.593*** |
|                | C               | 2265 | 22145 | 60   | -127.236*** |
| 02 August 2019 | A               | 1529 | 20108 | 41   | -126.299*** |
|                | B               | 1468 | 21428 | 31   | -131.904*** |
|                | C               | 2348 | 21977 | 51   | -125.849*** |
| 03 August 2019 | A               | 1646 | 19612 | 30   | -123.216*** |
|                | B               | 1489 | 20300 | 25   | -127.430*** |
|                | C               | 2523 | 20336 | 46   | -117.811*** |
| 04 August 2019 | A               | 1250 | 21289 | 29   | -133.471*** |
|                | B               | 1171 | 21778 | 27   | -136.023*** |
|                | C               | 2043 | 22059 | 41   | -128.923*** |
| 05 August 2019 | A               | 1130 | 21561 | 25   | -135.626*** |
|                | B               | 1233 | 22310 | 22   | -137.359*** |
|                | C               | 2425 | 22615 | 39   | -127.584*** |
| 06 August 2019 | A               | 1170 | 21127 | 25   | -133.644*** |
|                | B               | 1123 | 22314 | 26   | -138.414*** |
|                | C               | 2325 | 21982 | 51   | -126.075*** |
| 07 August 2019 | A               | 1238 | 20764 | 37   | -131.632*** |
|                | B               | 1243 | 22056 | 38   | -136.347*** |
|                | C               | 2334 | 19938 | 30   | -117.952*** |

\*\*\*  $p < .001$

**Table C.2:** Sign test results for the transfer time component (for October, 2019).

| Departure date  | Data collection | S+   | S-    | Ties | STS         |
|-----------------|-----------------|------|-------|------|-------------|
| 01 October 2019 | A               | 466  | 10382 | 15   | -95.196***  |
|                 | B               | 587  | 12107 | 16   | -102.239*** |
|                 | C               | 799  | 15591 | 26   | -115.534*** |
| 02 October 2019 | A               | 591  | 10179 | 22   | -92.379***  |
|                 | B               | 634  | 10981 | 24   | -95.998***  |
|                 | C               | 1217 | 18938 | 31   | -124.817*** |
| 03 October 2019 | A               | 507  | 9938  | 20   | -92.269***  |
|                 | B               | 708  | 11251 | 22   | -96.400***  |
|                 | C               | 1143 | 19273 | 24   | -126.879*** |
| 04 October 2019 | A               | 512  | 9969  | 22   | -92.365***  |
|                 | B               | 669  | 11610 | 20   | -98.727***  |
|                 | C               | 1221 | 18970 | 33   | -124.902*** |
| 05 October 2019 | A               | 565  | 9334  | 7    | -88.126***  |
|                 | B               | 744  | 10800 | 20   | -93.584***  |
|                 | C               | 1172 | 16691 | 23   | -116.107*** |
| 06 October 2019 | A               | 457  | 9898  | 13   | -92.768***  |
|                 | B               | 577  | 11011 | 24   | -96.918***  |
|                 | C               | 937  | 16815 | 20   | -119.164*** |
| 07 October 2019 | A               | 432  | 9924  | 15   | -93.264***  |
|                 | B               | 551  | 11523 | 22   | -99.844***  |
|                 | C               | 898  | 20309 | 25   | -133.286*** |

\*\*\*  $p < .001$

**Table C.3:** Sign test results for the transfer time component (for December, 2019).

| Departure date   | Data collection | S+   | S-    | Ties | STS         |
|------------------|-----------------|------|-------|------|-------------|
| 01 December 2019 | A               | 541  | 9840  | 18   | -91.258***  |
|                  | B               | 544  | 10447 | 15   | -94.451***  |
|                  | C               | 746  | 15605 | 18   | -116.195*** |
| 02 December 2019 | A               | 589  | 9577  | 15   | -89.133***  |
|                  | B               | 658  | 10756 | 20   | -94.509***  |
|                  | C               | 758  | 14922 | 15   | -113.105*** |
| 03 December 2019 | A               | 494  | 8899  | 14   | -86.713***  |
|                  | B               | 738  | 11035 | 21   | -94.891***  |
|                  | C               | 804  | 14057 | 19   | -108.707*** |
| 04 December 2019 | A               | 533  | 9252  | 26   | -88.133***  |
|                  | B               | 686  | 11970 | 16   | -100.294*** |
|                  | C               | 800  | 13693 | 33   | -107.088*** |
| 05 December 2019 | A               | 596  | 9939  | 20   | -91.017***  |
|                  | B               | 845  | 13545 | 20   | -105.862*** |
|                  | C               | 955  | 14639 | 40   | -109.573*** |
| 06 December 2019 | A               | 655  | 11543 | 22   | -98.574***  |
|                  | B               | 896  | 14218 | 26   | -108.355*** |
|                  | C               | 938  | 15389 | 20   | -113.088*** |
| 07 December 2019 | A               | 708  | 8089  | 25   | -78.684***  |
|                  | B               | 1055 | 11767 | 28   | -94.592***  |
|                  | C               | 1140 | 12580 | 27   | -97.659***  |

\*\*\*  $p < .001$ **Table C.4:** Sign test results for the geographical detour factor component (for August, 2019).

| Departure date | Data collection | S+   | S-    | Ties | STS         |
|----------------|-----------------|------|-------|------|-------------|
| 01 August 2019 | A               | 5797 | 13736 | 1999 | -56.797 *** |
|                | B               | 5600 | 16693 | 1618 | -74.289 *** |
|                | C               | 6598 | 15694 | 2178 | -60.916 *** |
| 02 August 2019 | A               | 6001 | 13697 | 1980 | -54.827 *** |
|                | B               | 5763 | 15454 | 1710 | -66.525 *** |
|                | C               | 6811 | 15661 | 1904 | -59.030 *** |
| 03 August 2019 | A               | 6094 | 13632 | 1562 | -53.664 *** |
|                | B               | 5547 | 14989 | 1278 | -65.881 *** |
|                | C               | 6253 | 15093 | 1559 | -60.499 *** |
| 04 August 2019 | A               | 5695 | 14999 | 1874 | -64.670 *** |
|                | B               | 5529 | 15809 | 1638 | -70.368 *** |
|                | C               | 6233 | 16149 | 1761 | -66.274 *** |
| 05 August 2019 | A               | 5520 | 15194 | 2002 | -67.209 *** |
|                | B               | 5379 | 16594 | 1592 | -75.651 *** |
|                | C               | 6292 | 16669 | 2118 | -68.475 *** |
| 06 August 2019 | A               | 5185 | 15344 | 1793 | -70.896 *** |
|                | B               | 4939 | 16888 | 1636 | -80.872 *** |
|                | C               | 5941 | 16419 | 1998 | -70.065 *** |
| 07 August 2019 | A               | 5342 | 15002 | 1695 | -67.720 *** |
|                | B               | 5053 | 16698 | 1586 | -78.952 *** |
|                | C               | 5450 | 15130 | 1722 | -67.470 *** |

\*\*\*  $p < .001$

**Table C.5:** Sign test results for the geographical detour factor component (for October, 2019).

| Departure date  | Data collection | S+   | S-    | Ties | STS         |
|-----------------|-----------------|------|-------|------|-------------|
| 01 October 2019 | A               | 2732 | 7028  | 1103 | -43.475 *** |
|                 | B               | 3059 | 8479  | 1172 | -50.449 *** |
|                 | C               | 3654 | 11641 | 1121 | -64.574 *** |
| 02 October 2019 | A               | 2653 | 7070  | 1069 | -44.785 *** |
|                 | B               | 2794 | 7792  | 1053 | -48.567 *** |
|                 | C               | 4288 | 14405 | 1493 | -73.989 *** |
| 03 October 2019 | A               | 2606 | 6634  | 1225 | -41.893 *** |
|                 | B               | 2913 | 7990  | 1078 | -48.613 *** |
|                 | C               | 4558 | 14412 | 1470 | -71.538 *** |
| 04 October 2019 | A               | 2577 | 6666  | 1260 | -42.521 *** |
|                 | B               | 2946 | 8290  | 1063 | -50.406 *** |
|                 | C               | 4446 | 14400 | 1378 | -72.501 *** |
| 05 October 2019 | A               | 2664 | 6453  | 789  | -39.672 *** |
|                 | B               | 3030 | 7669  | 865  | -44.839 *** |
|                 | C               | 4141 | 12803 | 942  | -66.537 *** |
| 06 October 2019 | A               | 2579 | 6708  | 1081 | -42.835 *** |
|                 | B               | 2940 | 7669  | 1003 | -45.903 *** |
|                 | C               | 4005 | 12547 | 1220 | -66.387 *** |
| 07 October 2019 | A               | 2581 | 6518  | 1272 | -41.263 *** |
|                 | B               | 2902 | 8092  | 1102 | -49.489 *** |
|                 | C               | 4363 | 15360 | 1509 | -78.298 *** |

\*\*\*  $p < .001$ **Table C.6:** Sign test results for the geographical detour factor component (for December, 2019).

| Departure date   | Data collection | S+   | S-    | Ties | STS         |
|------------------|-----------------|------|-------|------|-------------|
| 01 December 2019 | A               | 2495 | 6956  | 948  | -45.877 *** |
|                  | B               | 2800 | 7182  | 1024 | -43.849 *** |
|                  | C               | 3590 | 11695 | 1084 | -65.549 *** |
| 02 December 2019 | A               | 2356 | 6826  | 999  | -46.638 *** |
|                  | B               | 2742 | 7594  | 1098 | -47.715 *** |
|                  | C               | 3245 | 11289 | 1161 | -66.715 *** |
| 03 December 2019 | A               | 2263 | 6363  | 781  | -44.134 *** |
|                  | B               | 2820 | 7980  | 994  | -49.643 *** |
|                  | C               | 3359 | 10355 | 1166 | -59.732 *** |
| 04 December 2019 | A               | 2430 | 6554  | 827  | -43.499 *** |
|                  | B               | 2908 | 8723  | 1041 | -53.910 *** |
|                  | C               | 3053 | 10325 | 1148 | -62.863 *** |
| 05 December 2019 | A               | 2618 | 7039  | 898  | -44.978 *** |
|                  | B               | 3077 | 10186 | 1147 | -61.720 *** |
|                  | C               | 3211 | 11362 | 1061 | -67.512 *** |
| 06 December 2019 | A               | 2879 | 8290  | 1051 | -51.191 *** |
|                  | B               | 3191 | 10697 | 1252 | -63.684 *** |
|                  | C               | 3348 | 11787 | 1212 | -68.588 *** |
| 07 December 2019 | A               | 2275 | 5960  | 587  | -40.596 *** |
|                  | B               | 2999 | 9110  | 741  | -55.525 *** |
|                  | C               | 3045 | 10103 | 599  | -61.545 *** |

\*\*\*  $p < .001$

## Appendix D: Descriptive statistics on the fare, transfer time and geographical detour factor difference distributions in the selected markets

**Table D.1:** Statistics with regard to the fare difference distribution (for August, 2019); considering only the lowest available virtually interlined (VI) flight itinerary and *indirect* traditional (iTR) flight itinerary for all OD-pairs between which VI is less expensive than iTR and between which VI renders a longer transfer time compared to the iTR alternative.

| Departure date | Data collection | Total N | Skewness | Kurtosis | KS statistic | Sig. |
|----------------|-----------------|---------|----------|----------|--------------|------|
| 01 August 2019 | A               | 19981   | 4.752    | 36.696   | 0.217        | .000 |
|                | B               | 22267   | 4.994    | 43.976   | 0.213        | .000 |
|                | C               | 22145   | 4.571    | 39.417   | 0.220        | .000 |
| 02 August 2019 | A               | 20108   | 5.140    | 46.000   | 0.223        | .000 |
|                | B               | 21428   | 4.290    | 30.962   | 0.205        | .000 |
|                | C               | 21977   | 4.008    | 24.806   | 0.214        | .000 |
| 03 August 2019 | A               | 19612   | 3.944    | 25.280   | 0.197        | .000 |
|                | B               | 20300   | 3.744    | 24.965   | 0.182        | .000 |
|                | C               | 20336   | 4.164    | 32.795   | 0.195        | .000 |
| 04 August 2019 | A               | 21289   | 4.798    | 46.423   | 0.194        | .000 |
|                | B               | 21778   | 4.054    | 29.185   | 0.185        | .000 |
|                | C               | 22059   | 3.680    | 26.152   | 0.175        | .000 |
| 05 August 2019 | A               | 21561   | 4.378    | 34.842   | 0.197        | .000 |
|                | B               | 22310   | 3.869    | 25.780   | 0.192        | .000 |
|                | C               | 22615   | 3.749    | 24.066   | 0.192        | .000 |
| 06 August 2019 | A               | 21127   | 5.072    | 43.506   | 0.219        | .000 |
|                | B               | 22314   | 4.534    | 32.237   | 0.210        | .000 |
|                | C               | 21982   | 3.554    | 20.911   | 0.188        | .000 |
| 07 August 2019 | A               | 20764   | 5.006    | 41.270   | 0.215        | .000 |
|                | B               | 22056   | 5.001    | 41.893   | 0.209        | .000 |
|                | C               | 19938   | 3.498    | 22.511   | 0.183        | .000 |

\*\*\*  $p < .001$

**Table D.2:** Statistics with regard to the transfer time difference distribution (for August, 2019); considering only the lowest available virtually interlined (VI) flight itinerary and *indirect* traditional (iTR) flight itinerary for all OD-pairs between which VI is less expensive than iTR and between which VI renders a longer transfer time compared to the iTR alternative.

| Departure date | Data collection | Total N | Skewness | Kurtosis | KS statistic | Sig. |
|----------------|-----------------|---------|----------|----------|--------------|------|
| 01 August 2019 | A               | 19981   | -0.878   | 0.533    | 0.079        | .000 |
|                | B               | 22267   | -0.759   | 0.163    | 0.071        | .000 |
|                | C               | 22145   | -0.868   | 0.500    | 0.075        | .000 |
| 02 August 2019 | A               | 20108   | -0.841   | 0.192    | 0.084        | .000 |
|                | B               | 21428   | -0.687   | -0.180   | 0.073        | .000 |
|                | C               | 21977   | -0.801   | 0.206    | 0.077        | .000 |
| 03 August 2019 | A               | 19612   | -0.679   | -0.007   | 0.064        | .000 |
|                | B               | 20300   | -0.627   | -0.197   | 0.061        | .000 |
|                | C               | 20336   | -0.859   | 0.447    | 0.074        | .000 |
| 04 August 2019 | A               | 21289   | -0.657   | -0.089   | 0.065        | .000 |
|                | B               | 21778   | -0.589   | -0.266   | 0.059        | .000 |
|                | C               | 22059   | -0.742   | 0.134    | 0.067        | .000 |
| 05 August 2019 | A               | 21561   | -0.722   | 0.087    | 0.061        | .000 |
|                | B               | 22310   | -0.639   | -0.126   | 0.056        | .000 |
|                | C               | 22615   | -0.768   | 0.249    | 0.066        | .000 |
| 06 August 2019 | A               | 21127   | -0.702   | 0.029    | 0.064        | .000 |



|                |   |       |        |        |       |      |
|----------------|---|-------|--------|--------|-------|------|
| 07 August 2019 | B | 22314 | -0.629 | -0.196 | 0.059 | .000 |
|                | C | 21982 | -0.833 | 0.460  | 0.068 | .000 |
|                | A | 20764 | -0.757 | 0.223  | 0.069 | .000 |
|                | B | 22056 | -0.731 | 0.079  | 0.068 | .000 |
|                | C | 19938 | -0.858 | 0.470  | 0.074 | .000 |

\*\*\*  $p < .001$

**Table D.3:** Statistics with regard to the fare difference distribution (for October, 2019); considering only the lowest available virtually interlined (VI) flight itinerary and *indirect* traditional (iTR) flight itinerary for all OD-pairs between which VI is less expensive than iTR and between which VI renders a longer transfer time compared to the iTR alternative.

| Departure date  | Data collection | Total N | Skewness | Kurtosis | KS statistic | Sig. |
|-----------------|-----------------|---------|----------|----------|--------------|------|
| 01 October 2019 | A               | 10382   | 6.043    | 56.985   | 0.241        | .000 |
|                 | B               | 12107   | 6.888    | 95.527   | 0.249        | .000 |
|                 | C               | 15591   | 6.017    | 60.544   | 0.235        | .000 |
| 02 October 2019 | A               | 10179   | 5.600    | 51.030   | 0.236        | .000 |
|                 | B               | 10981   | 7.077    | 107.530  | 0.240        | .000 |
|                 | C               | 18938   | 5.444    | 46.683   | 0.227        | .000 |
| 03 October 2019 | A               | 9938    | 6.782    | 105.967  | 0.232        | .000 |
|                 | B               | 11251   | 4.501    | 34.337   | 0.216        | .000 |
|                 | C               | 19273   | 5.032    | 42.951   | 0.219        | .000 |
| 04 October 2019 | A               | 9969    | 5.957    | 72.738   | 0.221        | .000 |
|                 | B               | 11610   | 7.120    | 95.389   | 0.240        | .000 |
|                 | C               | 18970   | 4.826    | 37.501   | 0.210        | .000 |
| 05 October 2019 | A               | 9334    | 6.334    | 90.557   | 0.217        | .000 |
|                 | B               | 10800   | 4.550    | 35.069   | 0.214        | .000 |
|                 | C               | 16691   | 4.753    | 35.988   | 0.208        | .000 |
| 06 October 2019 | A               | 9898    | 4.911    | 44.022   | 0.202        | .000 |
|                 | B               | 11011   | 3.760    | 23.314   | 0.186        | .000 |
|                 | C               | 16815   | 4.368    | 30.029   | 0.194        | .000 |
| 07 October 2019 | A               | 9924    | 7.730    | 126.563  | 0.237        | .000 |
|                 | B               | 11523   | 5.132    | 44.150   | 0.217        | .000 |
|                 | C               | 20309   | 5.049    | 38.571   | 0.220        | .000 |

\*\*\*  $p < .001$

**Table D.4:** Statistics with regard to the transfer time difference distribution (for October, 2019); considering only the lowest available virtually interlined (VI) flight itinerary and *indirect* traditional (iTR) flight itinerary for all OD-pairs between which VI is less expensive than iTR and between which VI renders a longer transfer time compared to the iTR alternative.

| Departure date  | Data collection | Total N | Skewness | Kurtosis | KS statistic | Sig. |
|-----------------|-----------------|---------|----------|----------|--------------|------|
| 01 October 2019 | A               | 10382   | -0.945   | 1.047    | 0.075        | .000 |
|                 | B               | 12107   | -0.915   | 0.908    | 0.075        | .000 |
|                 | C               | 15591   | -0.876   | 0.701    | 0.071        | .000 |
| 02 October 2019 | A               | 10179   | -0.944   | 0.828    | 0.088        | .000 |
|                 | B               | 10981   | -0.915   | 0.633    | 0.086        | .000 |
|                 | C               | 18938   | -0.834   | 0.404    | 0.080        | .000 |
| 03 October 2019 | A               | 9938    | -1.007   | 0.977    | 0.091        | .000 |
|                 | B               | 11251   | -0.934   | 0.624    | 0.089        | .000 |
|                 | C               | 19273   | -0.791   | 0.160    | 0.079        | .000 |
| 04 October 2019 | A               | 9969    | -0.871   | 0.628    | 0.079        | .000 |
|                 | B               | 11610   | -0.844   | 0.554    | 0.075        | .000 |
|                 | C               | 18970   | -0.785   | 0.355    | 0.067        | .000 |
| 05 October 2019 | A               | 9334    | -0.988   | 0.850    | 0.084        | .000 |
|                 | B               | 10800   | -0.939   | 0.665    | 0.085        | .000 |
|                 | C               | 16691   | -0.767   | 0.149    | 0.072        | .000 |

|                 |   |       |        |       |       |      |
|-----------------|---|-------|--------|-------|-------|------|
| 06 October 2019 | A | 9898  | -0.855 | 0.662 | 0.070 | .000 |
|                 | B | 11011 | -0.776 | 0.388 | 0.070 | .000 |
|                 | C | 16815 | -0.675 | 0.036 | 0.063 | .000 |
| 07 October 2019 | A | 9924  | -0.978 | 1.057 | 0.076 | .000 |
|                 | B | 11523 | -0.976 | 0.990 | 0.077 | .000 |
|                 | C | 20309 | -0.764 | 0.246 | 0.061 | .000 |

\*\*\*  $p < .001$

**Table D.5:** Statistics with regard to the fare difference distribution (for December, 2019); considering only the lowest available virtually interlined (VI) flight itinerary and *indirect* traditional (iTR) flight itinerary for all OD-pairs between which VI is less expensive than iTR and between which VI renders a longer transfer time compared to the iTR alternative.

| Departure date   | Data | Total N | Skewness | Kurtosis | KS statistic | Sig. |
|------------------|------|---------|----------|----------|--------------|------|
| 01 December 2019 | A    | 9840    | 5.749    | 52.952   | 0.247        | .000 |
|                  | B    | 10447   | 4.978    | 38.727   | 0.237        | .000 |
|                  | C    | 15605   | 5.701    | 51.011   | 0.224        | .000 |
| 02 December 2019 | A    | 9577    | 7.005    | 85.280   | 0.267        | .000 |
|                  | B    | 10756   | 4.976    | 35.705   | 0.248        | .000 |
|                  | C    | 14922   | 5.105    | 35.469   | 0.232        | .000 |
| 03 December 2019 | A    | 8899    | 4.894    | 31.015   | 0.265        | .000 |
|                  | B    | 11035   | 4.798    | 29.300   | 0.258        | .000 |
|                  | C    | 14057   | 5.915    | 56.192   | 0.257        | .000 |
| 04 December 2019 | A    | 9252    | 5.418    | 42.602   | 0.263        | .000 |
|                  | B    | 11970   | 5.124    | 35.838   | 0.245        | .000 |
|                  | C    | 13693   | 5.368    | 40.334   | 0.237        | .000 |
| 05 December 2019 | A    | 9939    | 4.958    | 33.471   | 0.248        | .000 |
|                  | B    | 13545   | 5.239    | 41.847   | 0.237        | .000 |
|                  | C    | 14639   | 5.249    | 38.475   | 0.238        | .000 |
| 06 December 2019 | A    | 11543   | 5.244    | 40.752   | 0.253        | .000 |
|                  | B    | 14218   | 5.628    | 49.765   | 0.247        | .000 |
|                  | C    | 15389   | 5.802    | 48.385   | 0.245        | .000 |
| 07 December 2019 | A    | 8089    | 4.724    | 30.284   | 0.236        | .000 |
|                  | B    | 11767   | 5.750    | 46.591   | 0.234        | .000 |
|                  | C    | 12580   | 5.867    | 48.866   | 0.231        | .000 |

\*\*\*  $p < .001$

**Table D.6:** Statistics with regard to the transfer time difference distribution (for December, 2019); considering only the lowest available virtually interlined (VI) flight itinerary and *indirect* traditional (iTR) flight itinerary for all OD-pairs between which VI is less expensive than iTR and between which VI renders a longer transfer time compared to the iTR alternative.

| Departure date   | Data | Total N | Skewness | Kurtosis | KS statistic | Sig. |
|------------------|------|---------|----------|----------|--------------|------|
| 01 December 2019 | A    | 9840    | -0.795   | 0.543    | 0.070        | .000 |
|                  | B    | 10447   | -0.727   | 0.495    | 0.061        | .000 |
|                  | C    | 15605   | -0.632   | 0.076    | 0.056        | .000 |
| 02 December 2019 | A    | 9577    | -0.925   | 0.770    | 0.085        | .000 |
|                  | B    | 10756   | -0.905   | 0.731    | 0.082        | .000 |
|                  | C    | 14922   | -0.797   | 0.346    | 0.069        | .000 |
| 03 December 2019 | A    | 8899    | -0.845   | 0.575    | 0.082        | .000 |
|                  | B    | 11035   | -0.821   | 0.378    | 0.082        | .000 |
|                  | C    | 14057   | -0.744   | 0.253    | 0.072        | .000 |
| 04 December 2019 | A    | 9252    | -0.984   | 0.840    | 0.089        | .000 |
|                  | B    | 11970   | -0.941   | 0.651    | 0.086        | .000 |
|                  | C    | 13693   | -0.913   | 0.606    | 0.082        | .000 |
| 05 December 2019 | A    | 9939    | -0.728   | 0.299    | 0.077        | .000 |

|                  |   |       |        |       |       |      |
|------------------|---|-------|--------|-------|-------|------|
| 06 December 2019 | B | 13545 | -0.689 | 0.072 | 0.073 | .000 |
|                  | C | 14639 | -0.697 | 0.035 | 0.073 | .000 |
|                  | A | 11543 | -1.021 | 0.933 | 0.083 | .000 |
| 07 December 2019 | B | 14218 | -0.841 | 0.322 | 0.073 | .000 |
|                  | C | 15389 | -0.778 | 0.200 | 0.067 | .000 |
|                  | A | 8089  | -0.922 | 0.905 | 0.083 | .000 |
|                  | B | 11767 | -0.829 | 0.450 | 0.076 | .000 |
|                  | C | 12580 | -0.866 | 0.410 | 0.078 | .000 |

\*\*\*  $p < .001$

**Table D.7:** Statistics with regard to the fare difference distribution (for August, 2019); considering only the lowest available virtually interlined flight (VI) itinerary and *indirect* traditional (iTR) flight itinerary for all OD-pairs between which VI is less expensive than iTR and between which VI renders a larger geographical detour factor compared to the iTR alternative.

| Departure date | Data collection | Total N | Skewness | Kurtosis | KS statistic | Sig. |
|----------------|-----------------|---------|----------|----------|--------------|------|
| 01 August 2019 | A               | 13736   | 4.435    | 30.410   | 0.204        | .000 |
|                | B               | 16693   | 5.400    | 50.684   | 0.211        | .000 |
|                | C               | 15694   | 4.640    | 37.962   | 0.215        | .000 |
| 02 August 2019 | A               | 13697   | 5.653    | 57.761   | 0.223        | .000 |
|                | B               | 15454   | 3.949    | 25.068   | 0.192        | .000 |
|                | C               | 15661   | 4.160    | 27.488   | 0.209        | .000 |
| 03 August 2019 | A               | 13632   | 4.207    | 29.542   | 0.199        | .000 |
|                | B               | 14989   | 4.003    | 30.259   | 0.181        | .000 |
|                | C               | 15093   | 4.368    | 37.555   | 0.193        | .000 |
| 04 August 2019 | A               | 14999   | 4.653    | 48.065   | 0.185        | .000 |
|                | B               | 15809   | 4.267    | 33.517   | 0.182        | .000 |
|                | C               | 16149   | 3.498    | 23.764   | 0.167        | .000 |
| 05 August 2019 | A               | 15194   | 4.108    | 31.348   | 0.185        | .000 |
|                | B               | 16594   | 3.473    | 18.739   | 0.183        | .000 |
|                | C               | 16669   | 3.610    | 22.254   | 0.185        | .000 |
| 06 August 2019 | A               | 15344   | 5.242    | 50.843   | 0.210        | .000 |
|                | B               | 16888   | 4.752    | 37.809   | 0.201        | .000 |
|                | C               | 16419   | 3.433    | 20.187   | 0.178        | .000 |
| 07 August 2019 | A               | 15002   | 4.648    | 32.890   | 0.202        | .000 |
|                | B               | 16698   | 5.301    | 50.330   | 0.202        | .000 |
|                | C               | 15130   | 3.364    | 21.881   | 0.171        | .000 |

\*\*\*  $p < .001$

**Table D.8:** Statistics with regard to the GeoDetour difference distribution (for August, 2019); considering only the lowest available virtually interlined flight (VI) itinerary and *indirect* traditional (iTR) flight itinerary for all OD-pairs between which VI is less expensive than iTR and between which VI renders a larger geographical detour factor compared to the iTR alternative.

| Departure date | Data collection | Total N | Skewness | Kurtosis | KS statistic | Sig. |
|----------------|-----------------|---------|----------|----------|--------------|------|
| 01 August 2019 | A               | 13736   | -9.126   | 173.426  | 0.291        | .000 |
|                | B               | 16693   | -6.616   | 71.741   | 0.282        | .000 |
|                | C               | 15694   | -10.726  | 220.113  | 0.313        | .000 |
| 02 August 2019 | A               | 13697   | -6.992   | 74.501   | 0.288        | .000 |
|                | B               | 15454   | -7.291   | 89.700   | 0.283        | .000 |
|                | C               | 15661   | -9.629   | 181.855  | 0.303        | .000 |
| 03 August 2019 | A               | 13632   | -8.763   | 145.711  | 0.287        | .000 |
|                | B               | 14989   | -9.727   | 161.042  | 0.300        | .000 |
|                | C               | 15093   | -6.988   | 86.766   | 0.285        | .000 |
| 04 August 2019 | A               | 14999   | -7.135   | 87.405   | 0.280        | .000 |
|                | B               | 15809   | -10.422  | 200.151  | 0.299        | .000 |
|                | C               | 16149   | -9.214   | 148.310  | 0.307        | .000 |

|                |   |       |        |         |       |      |
|----------------|---|-------|--------|---------|-------|------|
| 05 August 2019 | A | 15194 | -7.685 | 96.797  | 0.291 | .000 |
|                | B | 16594 | -8.849 | 132.206 | 0.300 | .000 |
|                | C | 16669 | -8.561 | 127.743 | 0.304 | .000 |
| 06 August 2019 | A | 15344 | -8.194 | 132.937 | 0.286 | .000 |
|                | B | 16888 | -8.046 | 115.429 | 0.291 | .000 |
|                | C | 16419 | -9.441 | 166.460 | 0.301 | .000 |
| 07 August 2019 | A | 15002 | -9.053 | 165.532 | 0.292 | .000 |
|                | B | 16698 | -9.213 | 157.997 | 0.295 | .000 |
|                | C | 15130 | -8.564 | 118.320 | 0.313 | .000 |

\*\*\*  $p < .001$

**Table D.9:** Statistics with regard to the fare difference distribution (for October, 2019); considering only the lowest available virtually interlined flight (VI) itinerary and *indirect* traditional (iTR) flight itinerary for all OD-pairs between which VI is less expensive than iTR and between which VI renders a larger geographical detour factor compared to the iTR alternative.

| Departure date  | Data collection | Total N | Skewness | Kurtosis | KS statistic | Sig. |
|-----------------|-----------------|---------|----------|----------|--------------|------|
| 01 October 2019 | A               | 7028    | 6.246    | 60.501   | 0.243        | .000 |
|                 | B               | 8479    | 7.508    | 120.560  | 0.247        | .000 |
|                 | C               | 11641   | 6.461    | 71.161   | 0.233        | .000 |
| 02 October 2019 | A               | 7070    | 5.613    | 51.898   | 0.232        | .000 |
|                 | B               | 7792    | 7.903    | 133.907  | 0.243        | .000 |
|                 | C               | 14405   | 5.738    | 53.640   | 0.222        | .000 |
| 03 October 2019 | A               | 6634    | 5.138    | 43.875   | 0.223        | .000 |
|                 | B               | 7990    | 4.682    | 37.955   | 0.215        | .000 |
|                 | C               | 14412   | 5.520    | 53.491   | 0.218        | .000 |
| 04 October 2019 | A               | 6666    | 6.623    | 97.926   | 0.214        | .000 |
|                 | B               | 8290    | 7.301    | 103.611  | 0.230        | .000 |
|                 | C               | 14400   | 5.163    | 45.241   | 0.207        | .000 |
| 05 October 2019 | A               | 6453    | 5.453    | 58.509   | 0.208        | .000 |
|                 | B               | 7669    | 4.265    | 28.578   | 0.209        | .000 |
|                 | C               | 12803   | 4.815    | 36.993   | 0.203        | .000 |
| 06 October 2019 | A               | 6708    | 4.600    | 37.732   | 0.194        | .000 |
|                 | B               | 7669    | 3.841    | 24.331   | 0.187        | .000 |
|                 | C               | 12547   | 4.548    | 33.430   | 0.191        | .000 |
| 07 October 2019 | A               | 6518    | 8.652    | 156.190  | 0.239        | .000 |
|                 | B               | 8092    | 5.522    | 51.677   | 0.218        | .000 |
|                 | C               | 15360   | 5.227    | 42.582   | 0.215        | .000 |

\*\*\*  $p < .001$

**Table D.10:** Statistics with regard to the GeoDetour difference distribution (for October, 2019); considering only the lowest available virtually interlined flight (VI) itinerary and *indirect* traditional (iTR) flight itinerary for all OD-pairs between which VI is less expensive than iTR and between which VI renders a larger geographical detour factor compared to the iTR alternative.

| Departure date  | Data collection | Total N | Skewness | Kurtosis | KS statistic | Sig. |
|-----------------|-----------------|---------|----------|----------|--------------|------|
| 01 October 2019 | A               | 7028    | -10.923  | 216.592  | 0.299        | .000 |
|                 | B               | 8479    | -9.236   | 145.860  | 0.297        | .000 |
|                 | C               | 11641   | -6.099   | 59.697   | 0.278        | .000 |
| 02 October 2019 | A               | 7070    | -10.616  | 204.849  | 0.305        | .000 |
|                 | B               | 7792    | -9.099   | 134.883  | 0.300        | .000 |
|                 | C               | 14405   | -7.317   | 90.724   | 0.282        | .000 |
| 03 October 2019 | A               | 6634    | -6.503   | 75.347   | 0.271        | .000 |
|                 | B               | 7990    | -24.972  | 1186.569 | 0.334        | .000 |
|                 | C               | 14412   | -13.661  | 387.412  | 0.303        | .000 |
| 04 October 2019 | A               | 6666    | -8.989   | 143.624  | 0.286        | .000 |
|                 | B               | 8290    | -10.587  | 194.090  | 0.299        | .000 |

|                 |   |       |         |         |       |      |
|-----------------|---|-------|---------|---------|-------|------|
| 05 October 2019 | C | 14400 | -8.865  | 151.502 | 0.288 | .000 |
|                 | A | 6453  | -6.524  | 80.005  | 0.271 | .000 |
|                 | B | 7669  | -6.042  | 61.340  | 0.270 | .000 |
| 06 October 2019 | C | 12803 | -12.176 | 316.848 | 0.297 | .000 |
|                 | A | 6708  | -5.822  | 68.602  | 0.262 | .000 |
|                 | B | 7669  | -7.788  | 106.521 | 0.288 | .000 |
| 07 October 2019 | C | 12547 | -6.591  | 75.700  | 0.281 | .000 |
|                 | A | 6518  | -8.031  | 119.483 | 0.281 | .000 |
|                 | B | 8092  | -8.630  | 134.797 | 0.287 | .000 |
|                 | C | 15360 | -7.725  | 123.932 | 0.273 | .000 |

\*\*\*  $p < .001$

**Table D.11:** Statistics with regard to the fare difference distribution (for December, 2019); considering only the lowest available virtually interlined flight (VI) itinerary and *indirect* traditional (iTR) flight itinerary for all OD-pairs between which VI is less expensive than iTR and between which VI renders a larger geographical detour factor compared to the iTR alternative.

| Departure date   | Data | Total N | Skewness | Kurtosis | KS statistic | Sig. |
|------------------|------|---------|----------|----------|--------------|------|
| 01 December 2019 | A    | 6956    | 6.321    | 65.042   | 0.247        | .000 |
|                  | B    | 7182    | 5.428    | 49.044   | 0.233        | .000 |
|                  | C    | 11695   | 6.336    | 66.265   | 0.219        | .000 |
| 02 December 2019 | A    | 6826    | 7.055    | 88.510   | 0.259        | .000 |
|                  | B    | 7594    | 5.311    | 41.768   | 0.245        | .000 |
|                  | C    | 11289   | 5.426    | 41.570   | 0.224        | .000 |
| 03 December 2019 | A    | 6363    | 5.172    | 34.876   | 0.266        | .000 |
|                  | B    | 7980    | 4.961    | 31.623   | 0.255        | .000 |
|                  | C    | 10355   | 6.745    | 77.765   | 0.254        | .000 |
| 04 December 2019 | A    | 6554    | 5.548    | 43.233   | 0.258        | .000 |
|                  | B    | 8723    | 5.456    | 41.515   | 0.243        | .000 |
|                  | C    | 10325   | 5.279    | 37.894   | 0.224        | .000 |
| 05 December 2019 | A    | 7039    | 4.999    | 33.944   | 0.249        | .000 |
|                  | B    | 10186   | 5.623    | 49.743   | 0.236        | .000 |
|                  | C    | 11362   | 5.655    | 46.410   | 0.234        | .000 |
| 06 December 2019 | A    | 8290    | 5.726    | 49.204   | 0.256        | .000 |
|                  | B    | 10697   | 5.605    | 45.243   | 0.238        | .000 |
|                  | C    | 11787   | 6.153    | 56.010   | 0.239        | .000 |
| 07 December 2019 | A    | 5960    | 5.041    | 36.096   | 0.232        | .000 |
|                  | B    | 9110    | 6.313    | 58.193   | 0.230        | .000 |
|                  | C    | 10103   | 6.512    | 60.523   | 0.231        | .000 |

\*\*\*  $p < .001$

**Table D.12:** Statistics with regard to the GeoDetour difference distribution (for December, 2019); considering only the lowest available virtually interlined flight (VI) itinerary and *indirect* traditional (iTR) flight itinerary for all OD-pairs between which VI is less expensive than iTR and between which VI renders a larger geographical detour factor compared to the iTR alternative.

| Departure date   | Data | Total N | Skewness | Kurtosis | KS statistic | Sig. |
|------------------|------|---------|----------|----------|--------------|------|
| 01 December 2019 | A    | 6956    | -8.794   | 133.829  | 0.304        | .000 |
|                  | B    | 7182    | -11.534  | 239.867  | 0.314        | .000 |
|                  | C    | 11695   | -14.981  | 479.996  | 0.302        | .000 |
| 02 December 2019 | A    | 6826    | -19.894  | 711.092  | 0.337        | .000 |
|                  | B    | 7594    | -26.790  | 1107.915 | 0.348        | .000 |
|                  | C    | 11289   | -21.491  | 821.581  | 0.320        | .000 |
| 03 December 2019 | A    | 6363    | -12.889  | 283.418  | 0.324        | .000 |
|                  | B    | 7980    | -25.402  | 994.699  | 0.343        | .000 |
|                  | C    | 10355   | -22.349  | 786.535  | 0.338        | .000 |

|                  |   |       |         |          |       |      |
|------------------|---|-------|---------|----------|-------|------|
| 04 December 2019 | A | 6554  | -26.590 | 1036.381 | 0.359 | .000 |
|                  | B | 8723  | -27.913 | 1260.374 | 0.334 | .000 |
|                  | C | 10325 | -25.254 | 1024.223 | 0.328 | .000 |
| 05 December 2019 | A | 7039  | -21.751 | 824.093  | 0.345 | .000 |
|                  | B | 10186 | -21.769 | 832.276  | 0.329 | .000 |
|                  | C | 11362 | -18.200 | 648.260  | 0.315 | .000 |
| 06 December 2019 | A | 8290  | -17.542 | 598.472  | 0.323 | .000 |
|                  | B | 10697 | -22.853 | 884.847  | 0.323 | .000 |
|                  | C | 11787 | -17.644 | 575.439  | 0.316 | .000 |
| 07 December 2019 | A | 5960  | -21.384 | 878.145  | 0.327 | .000 |
|                  | B | 9110  | -18.295 | 753.672  | 0.297 | .000 |
|                  | C | 10103 | -16.499 | 573.132  | 0.306 | .000 |

\*\*\*  $p < .001$

## Appendix E: Correlation tests

**Table E.1:** Correlation test of the iTR-VI fare > 0 distribution and the iTR-VI transfer time < 0 distribution (for August, 2019).

| Departure date | Data collection | Total N | Kendall's tau-b |      | Spearman's rho |      |
|----------------|-----------------|---------|-----------------|------|----------------|------|
|                |                 |         | Corr. Coeff.    | Sig. | Corr. Coeff.   | Sig. |
| 01 August 2019 | A               | 19981   | -0.114**        | .000 | -0.170**       | .000 |
|                | B               | 22267   | -0.122**        | .000 | -0.182**       | .000 |
|                | C               | 22145   | -0.100**        | .000 | -0.149**       | .000 |
| 02 August 2019 | A               | 20108   | -0.120**        | .000 | -0.180**       | .000 |
|                | B               | 21428   | -0.126**        | .000 | -0.189**       | .000 |
|                | C               | 21977   | -0.108**        | .000 | -0.161**       | .000 |
| 03 August 2019 | A               | 19612   | -0.126**        | .000 | -0.188**       | .000 |
|                | B               | 20300   | -0.131**        | .000 | -0.195**       | .000 |
|                | C               | 20336   | -0.104**        | .000 | -0.155**       | .000 |
| 04 August 2019 | A               | 21289   | -0.143**        | .000 | -0.213**       | .000 |
|                | B               | 21778   | -0.161**        | .000 | -0.240**       | .000 |
|                | C               | 22059   | -0.123**        | .000 | -0.183**       | .000 |
| 05 August 2019 | A               | 21561   | -0.155**        | .000 | -0.231**       | .000 |
|                | B               | 22310   | -0.151**        | .000 | -0.226**       | .000 |
|                | C               | 22615   | -0.130**        | .000 | -0.194**       | .000 |
| 06 August 2019 | A               | 21127   | -0.136**        | .000 | -0.203**       | .000 |
|                | B               | 22314   | -0.131**        | .000 | -0.196**       | .000 |
|                | C               | 21982   | -0.113**        | .000 | -0.168**       | .000 |
| 07 August 2019 | A               | 20764   | -0.125**        | .000 | -0.186**       | .000 |
|                | B               | 22056   | -0.113**        | .000 | -0.168**       | .000 |
|                | C               | 19938   | -0.087**        | .000 | -0.130**       | .000 |

\*\*  $p < .01$

**Table E.2:** Correlation test of the iTR-VI fare > 0 distribution and the iTR-VI transfer time < 0 distribution (for October, 2019).

| Departure date  | Data collection | Total N | Kendall's tau-b |      | Spearman's rho |      |
|-----------------|-----------------|---------|-----------------|------|----------------|------|
|                 |                 |         | Corr. Coeff.    | Sig. | Corr. Coeff.   | Sig. |
| 01 October 2019 | A               | 10382   | -0.050**        | .000 | -0.075**       | .000 |
|                 | B               | 12107   | -0.074**        | .000 | -0.111**       | .000 |
|                 | C               | 15591   | -0.088**        | .000 | -0.131**       | .000 |
| 02 October 2019 | A               | 10179   | -0.047**        | .000 | -0.071**       | .000 |
|                 | B               | 10981   | -0.054**        | .000 | -0.080**       | .000 |
|                 | C               | 18938   | -0.085**        | .000 | -0.126**       | .000 |
| 03 October 2019 | A               | 9938    | -0.063**        | .000 | -0.093**       | .000 |
|                 | B               | 11251   | -0.059**        | .000 | -0.088**       | .000 |
|                 | C               | 19273   | -0.102**        | .000 | -0.152**       | .000 |
| 04 October 2019 | A               | 9969    | -0.079**        | .000 | -0.117**       | .000 |
|                 | B               | 11610   | -0.085**        | .000 | -0.126**       | .000 |
|                 | C               | 18970   | -0.104**        | .000 | -0.155**       | .000 |
| 05 October 2019 | A               | 9334    | -0.067**        | .000 | -0.101**       | .000 |
|                 | B               | 10800   | -0.062**        | .000 | -0.092**       | .000 |
|                 | C               | 16691   | -0.088**        | .000 | -0.131**       | .000 |
| 06 October 2019 | A               | 9898    | -0.093**        | .000 | -0.138**       | .000 |
|                 | B               | 11011   | -0.095**        | .000 | -0.142**       | .000 |
|                 | C               | 16815   | -0.127**        | .000 | -0.189**       | .000 |
| 07 October 2019 | A               | 9924    | -0.072**        | .000 | -0.108**       | .000 |
|                 | B               | 11523   | -0.070**        | .000 | -0.104**       | .000 |
|                 | C               | 20309   | -0.103**        | .000 | -0.153**       | .000 |

\*\*  $p < .01$

**Table E.3:** Correlation test of the iTR-VI fare > 0 distribution and the iTR-VI transfer time < 0 distribution (for December, 2019).

| Departure date   | Data collection | Total N | Kendall's tau-b |      | Spearman's rho |      |
|------------------|-----------------|---------|-----------------|------|----------------|------|
|                  |                 |         | Corr. Coeff.    | Sig. | Corr. Coeff.   | Sig. |
| 01 December 2019 | A               | 9840    | -0.069**        | .000 | -0.103**       | .000 |
|                  | B               | 10447   | -0.068**        | .000 | -0.101**       | .000 |
|                  | C               | 15605   | -0.099**        | .000 | -0.147**       | .000 |
| 02 December 2019 | A               | 9577    | -0.087**        | .000 | -0.129**       | .000 |
|                  | B               | 10756   | -0.101**        | .000 | -0.151**       | .000 |
|                  | C               | 14922   | -0.095**        | .000 | -0.142**       | .000 |
| 03 December 2019 | A               | 8899    | -0.073**        | .000 | -0.108**       | .000 |
|                  | B               | 11035   | -0.093**        | .000 | -0.140**       | .000 |
|                  | C               | 14057   | -0.098**        | .000 | -0.146**       | .000 |
| 04 December 2019 | A               | 9252    | -0.073**        | .000 | -0.108**       | .000 |
|                  | B               | 11970   | -0.085**        | .000 | -0.126**       | .000 |
|                  | C               | 13693   | -0.068**        | .000 | -0.101**       | .000 |
| 05 December 2019 | A               | 9939    | -0.078**        | .000 | -0.117**       | .000 |
|                  | B               | 13545   | -0.084**        | .000 | -0.126**       | .000 |
|                  | C               | 14639   | -0.069**        | .000 | -0.103**       | .000 |
| 06 December 2019 | A               | 11543   | -0.074**        | .000 | -0.109**       | .000 |
|                  | B               | 14218   | -0.073**        | .000 | -0.110**       | .000 |
|                  | C               | 15389   | -0.071**        | .000 | -0.106**       | .000 |
| 07 December 2019 | A               | 8089    | -0.073**        | .000 | -0.109**       | .000 |
|                  | B               | 11767   | -0.078**        | .000 | -0.116**       | .000 |
|                  | C               | 12580   | -0.053**        | .000 | -0.079**       | .000 |

\*\*  $p < .01$

**Table E.4:** Correlation test of the iTR-VI fare > 0 distribution and the iTR-VI geographical detour factor < 0 distribution (for August, 2019).

| Departure date | Data collection | Total N | Kendall's tau-b |       | Spearman's rho |       |
|----------------|-----------------|---------|-----------------|-------|----------------|-------|
|                |                 |         | Corr. Coeff.    | Sig.  | Corr. Coeff.   | Sig.  |
| 01 August 2019 | A               | 13736   | 0.042**         | .000  | 0.064**        | .000  |
|                | B               | 16693   | 0.048**         | .000  | 0.072**        | .000  |
|                | C               | 15694   | 0.028**         | .000  | 0.041**        | .000  |
| 02 August 2019 | A               | 13697   | 0.061**         | .000  | 0.091**        | .000  |
|                | B               | 15454   | 0.072**         | .000  | 0.108**        | .000  |
|                | C               | 15661   | 0.023**         | .000  | 0.034**        | .000  |
| 03 August 2019 | A               | 13632   | 0.066**         | .000  | 0.098**        | .000  |
|                | B               | 14989   | 0.074**         | .000  | 0.111**        | .000  |
|                | C               | 15093   | 0.038**         | .000  | 0.057**        | 0.000 |
| 04 August 2019 | A               | 14999   | 0.065**         | .000  | 0.098**        | .000  |
|                | B               | 15809   | 0.052**         | .000  | 0.077**        | .000  |
|                | C               | 16149   | 0.007           | .203  | 0.010          | 0.206 |
| 05 August 2019 | A               | 15194   | 0.049**         | .000  | 0.074**        | .000  |
|                | B               | 16594   | 0.053**         | .000  | 0.078**        | .000  |
|                | C               | 16669   | -0.008          | 0.126 | -0.012         | 0.121 |
| 06 August 2019 | A               | 15344   | 0.039**         | .000  | 0.059**        | .000  |
|                | B               | 16888   | 0.057**         | .000  | 0.085**        | .000  |
|                | C               | 16419   | -0.001          | 0.898 | -0.001         | 0.897 |
| 07 August 2019 | A               | 15002   | 0.055**         | .000  | 0.082**        | .000  |
|                | B               | 16698   | 0.058**         | .000  | 0.087**        | .000  |
|                | C               | 15130   | -0.030**        | .000  | -0.044**       | .000  |

\*\*  $p < .01$



**Table E.5:** Correlation test of the iTR-VI fare > 0 distribution and the iTR-VI geographical detour factor < 0 distribution (for October, 2019).

| Departure date  | Data collection | Total N | Kendall's tau-b |      | Spearman's rho |      |
|-----------------|-----------------|---------|-----------------|------|----------------|------|
|                 |                 |         | Corr. Coeff.    | Sig. | Corr. Coeff.   | Sig. |
| 01 October 2019 | A               | 7028    | 0.067**         | .000 | 0.100**        | .000 |
|                 | B               | 8479    | 0.079**         | .000 | 0.117**        | .000 |
|                 | C               | 11641   | 0.101**         | .000 | 0.151**        | .000 |
| 02 October 2019 | A               | 7070    | 0.064**         | .000 | 0.095**        | .000 |
|                 | B               | 7792    | 0.078**         | .000 | 0.115**        | .000 |
|                 | C               | 14405   | 0.078**         | .000 | 0.116**        | .000 |
| 03 October 2019 | A               | 6634    | 0.045**         | .000 | 0.067**        | .000 |
|                 | B               | 7990    | 0.042**         | .000 | 0.062**        | .000 |
|                 | C               | 14412   | 0.062**         | .000 | 0.093**        | .000 |
| 04 October 2019 | A               | 6666    | 0.069**         | .000 | 0.103**        | .000 |
|                 | B               | 8290    | 0.076**         | .000 | 0.113**        | .000 |
|                 | C               | 14400   | 0.084**         | .000 | 0.126**        | .000 |
| 05 October 2019 | A               | 6453    | 0.086**         | .000 | 0.127**        | .000 |
|                 | B               | 7669    | 0.061**         | .000 | 0.091**        | .000 |
|                 | C               | 12803   | 0.081**         | .000 | 0.120**        | .000 |
| 06 October 2019 | A               | 6708    | 0.079**         | .000 | 0.116**        | .000 |
|                 | B               | 7669    | 0.060**         | .000 | 0.089**        | .000 |
|                 | C               | 12547   | 0.073**         | .000 | 0.109**        | .000 |
| 07 October 2019 | A               | 6518    | 0.075**         | .000 | 0.111**        | .000 |
|                 | B               | 8092    | 0.061**         | .000 | 0.091**        | .000 |
|                 | C               | 15360   | 0.087**         | .000 | 0.130**        | .000 |

\*\*  $p < .01$

**Table E.6:** Correlation test of the iTR-VI fare > 0 distribution and the iTR-VI geographical detour factor < 0 distribution (for December, 2019).

| Departure date   | Data collection | Total N | Kendall's tau-b |      | Spearman's rho |      |
|------------------|-----------------|---------|-----------------|------|----------------|------|
|                  |                 |         | Corr. Coeff.    | Sig. | Corr. Coeff.   | Sig. |
| 01 December 2019 | A               | 6956    | 0.088**         | .000 | 0.132**        | .000 |
|                  | B               | 7182    | 0.099**         | .000 | 0.148**        | .000 |
|                  | C               | 11695   | 0.028**         | .000 | 0.041**        | .000 |
| 02 December 2019 | A               | 6826    | 0.090**         | .000 | 0.133**        | .000 |
|                  | B               | 7594    | 0.113**         | .000 | 0.168**        | .000 |
|                  | C               | 11289   | 0.042**         | .000 | 0.062**        | .000 |
| 03 December 2019 | A               | 6363    | 0.130**         | .000 | 0.194**        | .000 |
|                  | B               | 7980    | 0.069**         | .000 | 0.103**        | .000 |
|                  | C               | 10355   | 0.048**         | .000 | 0.072**        | .000 |
| 04 December 2019 | A               | 6554    | 0.116**         | .000 | 0.172**        | .000 |
|                  | B               | 8723    | 0.094**         | .000 | 0.139**        | .000 |
|                  | C               | 10325   | 0.064**         | .000 | 0.096**        | .000 |
| 05 December 2019 | A               | 7039    | 0.117**         | .000 | 0.174**        | .000 |
|                  | B               | 10186   | 0.102**         | .000 | 0.151**        | .000 |
|                  | C               | 11362   | 0.082**         | .000 | 0.121**        | .000 |
| 06 December 2019 | A               | 8290    | 0.117**         | .000 | 0.173**        | .000 |
|                  | B               | 10697   | 0.082**         | .000 | 0.122**        | .000 |
|                  | C               | 11787   | 0.069**         | .000 | 0.102**        | .000 |
| 07 December 2019 | A               | 5960    | 0.112**         | .000 | 0.166**        | .000 |
|                  | B               | 9110    | 0.090**         | .000 | 0.133**        | .000 |
|                  | C               | 10103   | 0.071**         | .000 | 0.105**        | .000 |

\*\*  $p < .01$
